# Supplementary material
Source: HighWire-hosted journal article supplement (https://bjsm.bmj.com/content/56/1/18)
Supplement: inline-supplementary-material-1 [file inline-supplementary-material-1.pdf]

1

## 2 Appendix 1. Injury severity categories by body region

|                                  | No. of Injuries | Severity, No. of Injuries (%) |           |            |           |
|----------------------------------|-----------------|-------------------------------|-----------|------------|-----------|
|                                  |                 | Mild                          | Minor     | Moderate   | Severe    |
| <b>Head/face</b>                 | 23              | 3 (13)                        | 7 (30.4)  | 11 (47.8)  | 2 (8.7)   |
| <i>Concussion</i>                | 11              | -                             | 4 (36.4)  | 7 (63.6)   | -         |
| <b>Shoulder/clavicle</b>         | 18              | 2 (11.1)                      | 4 (22.2)  | 4 (22.2)   | 8 (44.4)  |
| <b>Arm and hand</b>              | 22              | -                             | 3 (13.6)  | 11 (50)    | 12 (54.5) |
| <b>Torso</b>                     | 29              | 3 (10.3)                      | 7 (24.1)  | 11 (37.9)  | 2 (6.9)   |
| <b>Low back/sacrum/pelvis</b>    | 60              | 14 (23.3)                     | 17 (28.3) | 22 (36.7)  | 7 (11.7)  |
| <b>Hip/groin</b>                 | 119             | 21 (17.6)                     | 28 (23.5) | 56 (47.1)  | 14 (11.8) |
| <b>Thigh</b>                     | 355             | 35 (9.9)                      | 73 (20.6) | 185 (52.1) | 62 (17.5) |
| <i>Hamstring muscle strain</i>   | 200             | 8 (4)                         | 32 (16)   | 117 (58.5) | 43 (21.5) |
| <b>Knee</b>                      | 220             | 16 (7.3)                      | 35 (15.9) | 79 (35.9)  | 90 (40.9) |
| <i>ACL complete tear</i>         | 32              | -                             | -         | -          | 32 (100)  |
| <i>MCL injury</i>                | 63              | 2 (3.2)                       | 13 (20.6) | 29 (46)    | 19 (30.2) |
| <b>Lower leg/Achilles tendon</b> | 100             | 15 (15)                       | 23 (23)   | 47 (47)    | 15 (15)   |
| <b>Ankle</b>                     | 162             | 35 (21.6)                     | 41 (25.3) | 71 (43.8)  | 15 (9.3)  |
| <b>Foot/toe</b>                  | 50              | 13 (26)                       | 9 (18)    | 19 (38)    | 9 (18)    |

3

4
